# Supplementary material for: Endometrial Carcinoma: Molecular Cytogenetics and Transcriptomic Profile
Source: Cancers (Basel). 2022 Jul 20;14(14):3536. doi: 10.3390/cancers14143536 (PMC9325179; doi:10.3390/cancers14143536)
Supplement: Supplementary file 1 [file cancers-14-03536-s001.zip › Table S2..xlsx]

## Sheet: Sheet1
Table S2. Overview of the pathogenetic variants detected.
Sample ID	AA mutation	CDS mutation	Gene ID
1	not-informative
2	p.R505C	c.1513C>T	FBXW7
	p.Y376C	c.1127A>G	FGFR2
	p.S252W	c.755C>G	FGFR2
3	p.D32V	c.95A>T	CTNNB1
	p.V824=	c.2472C>T	PDGFRA
	p.M541L	c.1621A>C	KIT
	p.R479Q	c.1436G>A	FBXW7
	p.R130G	c.388C>G	PTEN
4	p.V824=	c.2472C>T	PDGFRA
	p.G12V	c.35G>T	KRAS
5		c.315C>T	IDH1
	p.V824=	c.2472C>T	PDGFRA
	p.Y16Lfs*28	c.46dup	PTEN
	p.S252W	c.755C>G	FGFR2
6	p.R88Q	c.263G>A	PIK3CA
	p.C901F	c.2702G>T	PIK3CA
	p.V824=	c.2472C>T	PDGFRA
	p.V410A	c.1229T>C	ATM
7	p.R130G	c.388C>G	PTEN
8	p.K111N	c.333G>T	PIK3CA
	p.H1048R	c.3143A>G	PIK3CA
	p.S252W	c.755C>G	FGFR2
	p.P604S	c.1810C>T	ATM
9	p.M541L	c.1621A>C	KIT
10	p.L113del	c.337_339del (Deletion)	PIK3CA
	p.E168D	c.504G>T	MET
	p.R130P	c.389G>C	PTEN
11	p.G34V	c.101G>T	CTNNB1
	p.P248Tfs*5	c.741dup (Insertion)	PTEN
12	p.S33P	c.97T>C	CTNNB1
	p.R88Q	c.263G>A	PIK3CA
	p.M541L	c.1621A>C	KIT
13	p.R88Q	c.263G>A	PIK3CA
	p.E542Q	c.1624G>C	PIK3CA
	p.V824=	c.2472C>T	PDGFRA
	p.R130G	c.388C>G	PTEN
	p.G12D	c.35G>A	KRAS
	p.R248Q	c.743G>A	TP53
	p.R158H	c.473G>A	TP53
14	p.S33C	c.98C>G	CTNNB1
15	p.H1047R	c.3140A>G	PIK3CA
	p.V824=	c.2472C>T	PDGFRA
	p.M541L	c.1621A>C	KIT
	p.?	c.209+4_209+7del (Deletion - intronic)	PTEN
	p.R130Qfs*4	c.389del (Deletion)	PTEN
16	p.S37F	c.110C>T	CTNNB1
	p.H1047R	c.3140A>G	PIK3CA
17	p.V824=	c.2472C>T	PDGFRA
	p.M541L	c.1621A>C	KIT
	p.?	c.1026+1G>T	PTEN
	p.G12D	c.35G>A	KRAS
18	p.R88Q	c.263G>A	PIK3CA
	p.T319Nfs*6	c.955dup	PTEN
	p.S252W	c.755C>G	FGFR2
19	no mutations
20	p.D32N	c.94G>A	CTNNB1
	p.M1043I	c.3129G>A	PIK3CA
	p.V824=	c.2472C>T	PDGFRA
21	p.M541L	c.1621A>C	KIT
	p.?	c.209+4_209+7del	PTEN
	p.?	c.209+1_209+2del	PTEN
22	p.V824=	c.2472C>T	PDGFRA
	p.R552*	c.1654C>T	RB1
23	p.M541L	c.1621A>C	KIT
	p.T319Kfs*24	c.956_959del	PTEN
	p.S252W	c.755C>G	FGFR2
24	no mutations
25	p.K546=	c.1638A>G	KIT
26	p.M541L	c.1621A>C	KIT
	p.R988C	c.2962C>T	MET
27	p.M1043I	c.3129G>C	PIK3CA
	p.R130G	c.388C>G	PTEN
28	p.R273C	c.817C>T	TP53
29	p.V824=	c.2472C>T	PDGFRA
	p.E1317Q	c.3949G>C	APC
	p.G12S	c.34G>A	KRAS
30	p.C420R	c.1258T>C	PIK3CA
	p.V824=	c.2472C>T	PDGFRA
	p.R465H	c.1394G>A	FBXW7
	p.E1317Q	c.3949G>C	APC
	p.R335*	c.1003C>T	PTEN
	p.R3008C	c.9022C>T	ATM
	p.R158H	c.473G>A	TP53
31	p.R130G	c.388C>G	PTEN
32	p.V824=	c.2472C>T	PDGFRA
	p.R130*	c.388C>T	PTEN
	p.A146T	c.436G>A	KRAS
33	p.M541L	c.1621A>C	KIT
	p.R130Q	c.389G>A	PTEN
